# Supplementary material for: Gestational breast cancer in a patient with Crohn’s disease: two case reports
Source: Springer Nature journal article supplement (doi:10.1186/s13256-021-03224-3), 2021-12-01
Supplement: MOESM1 [file 19976448]

**The timeline of " Gestational breast cancer in a patient with crohn's disease: a case report of two sisters "**

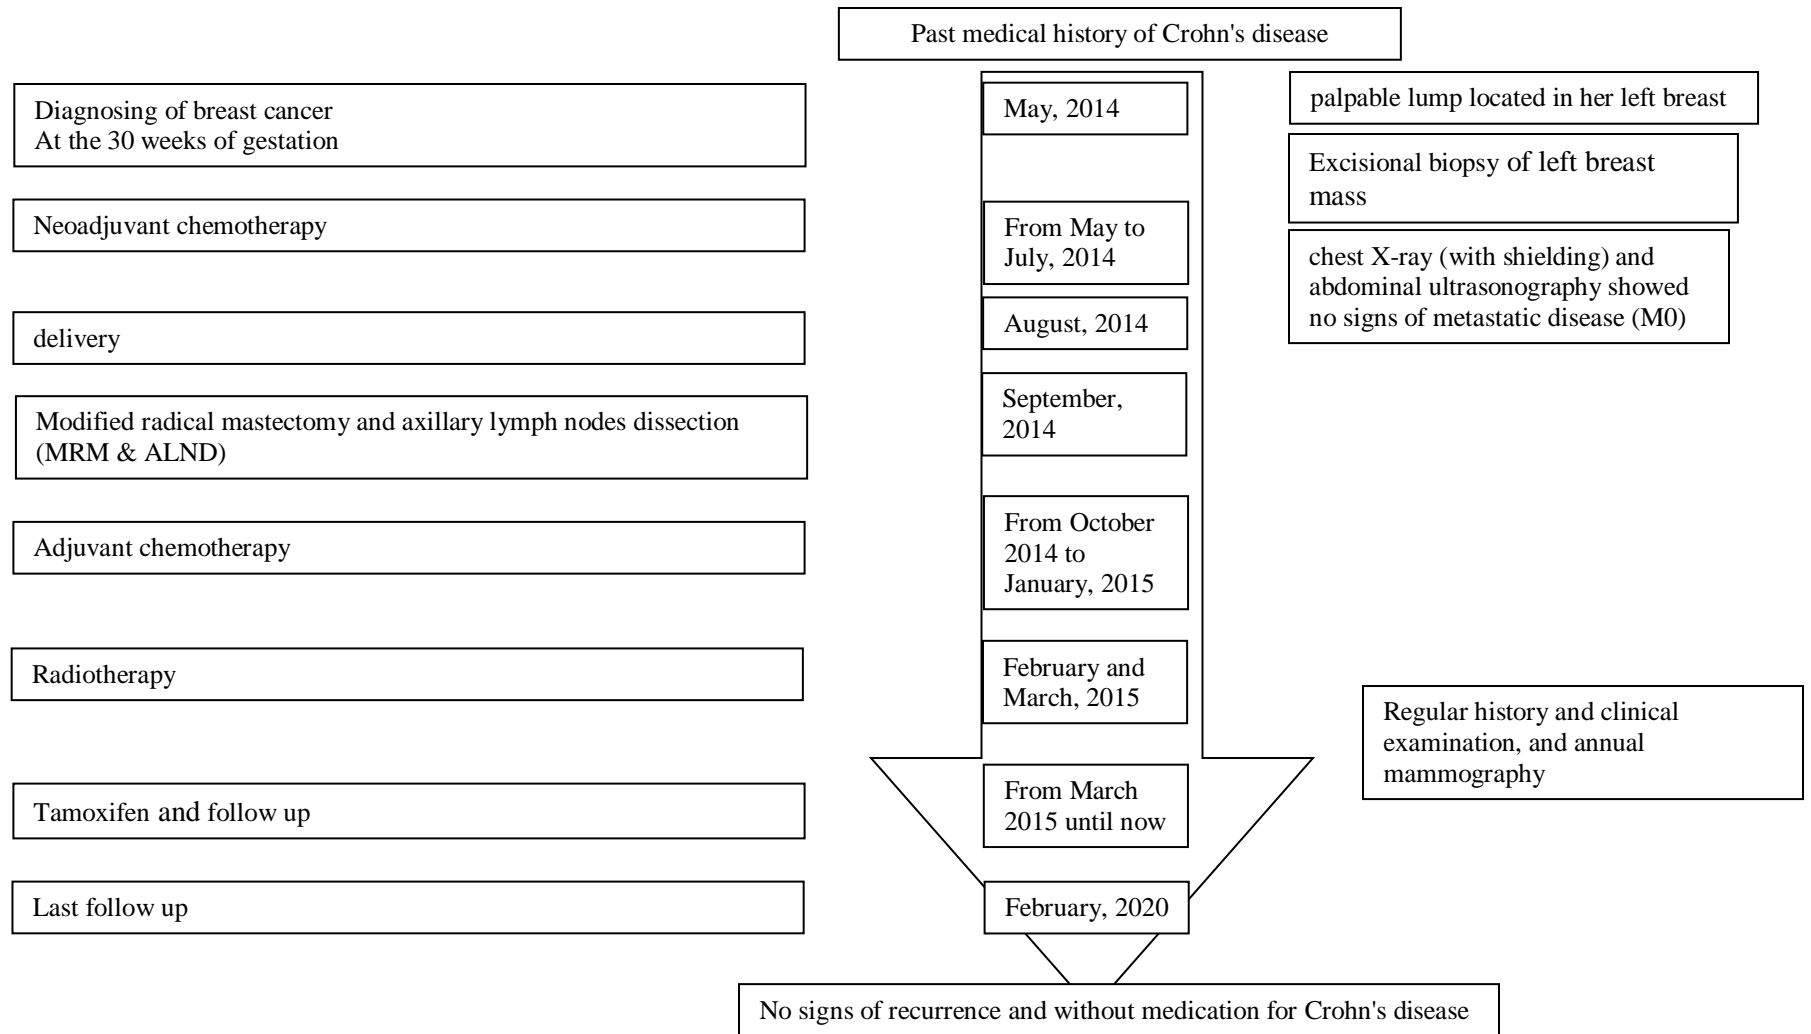

**Figure 1. The timeline for patient 1.**

**The timeline of " Gestational breast cancer in a patient with crohn's disease: a case report of two sisters "**

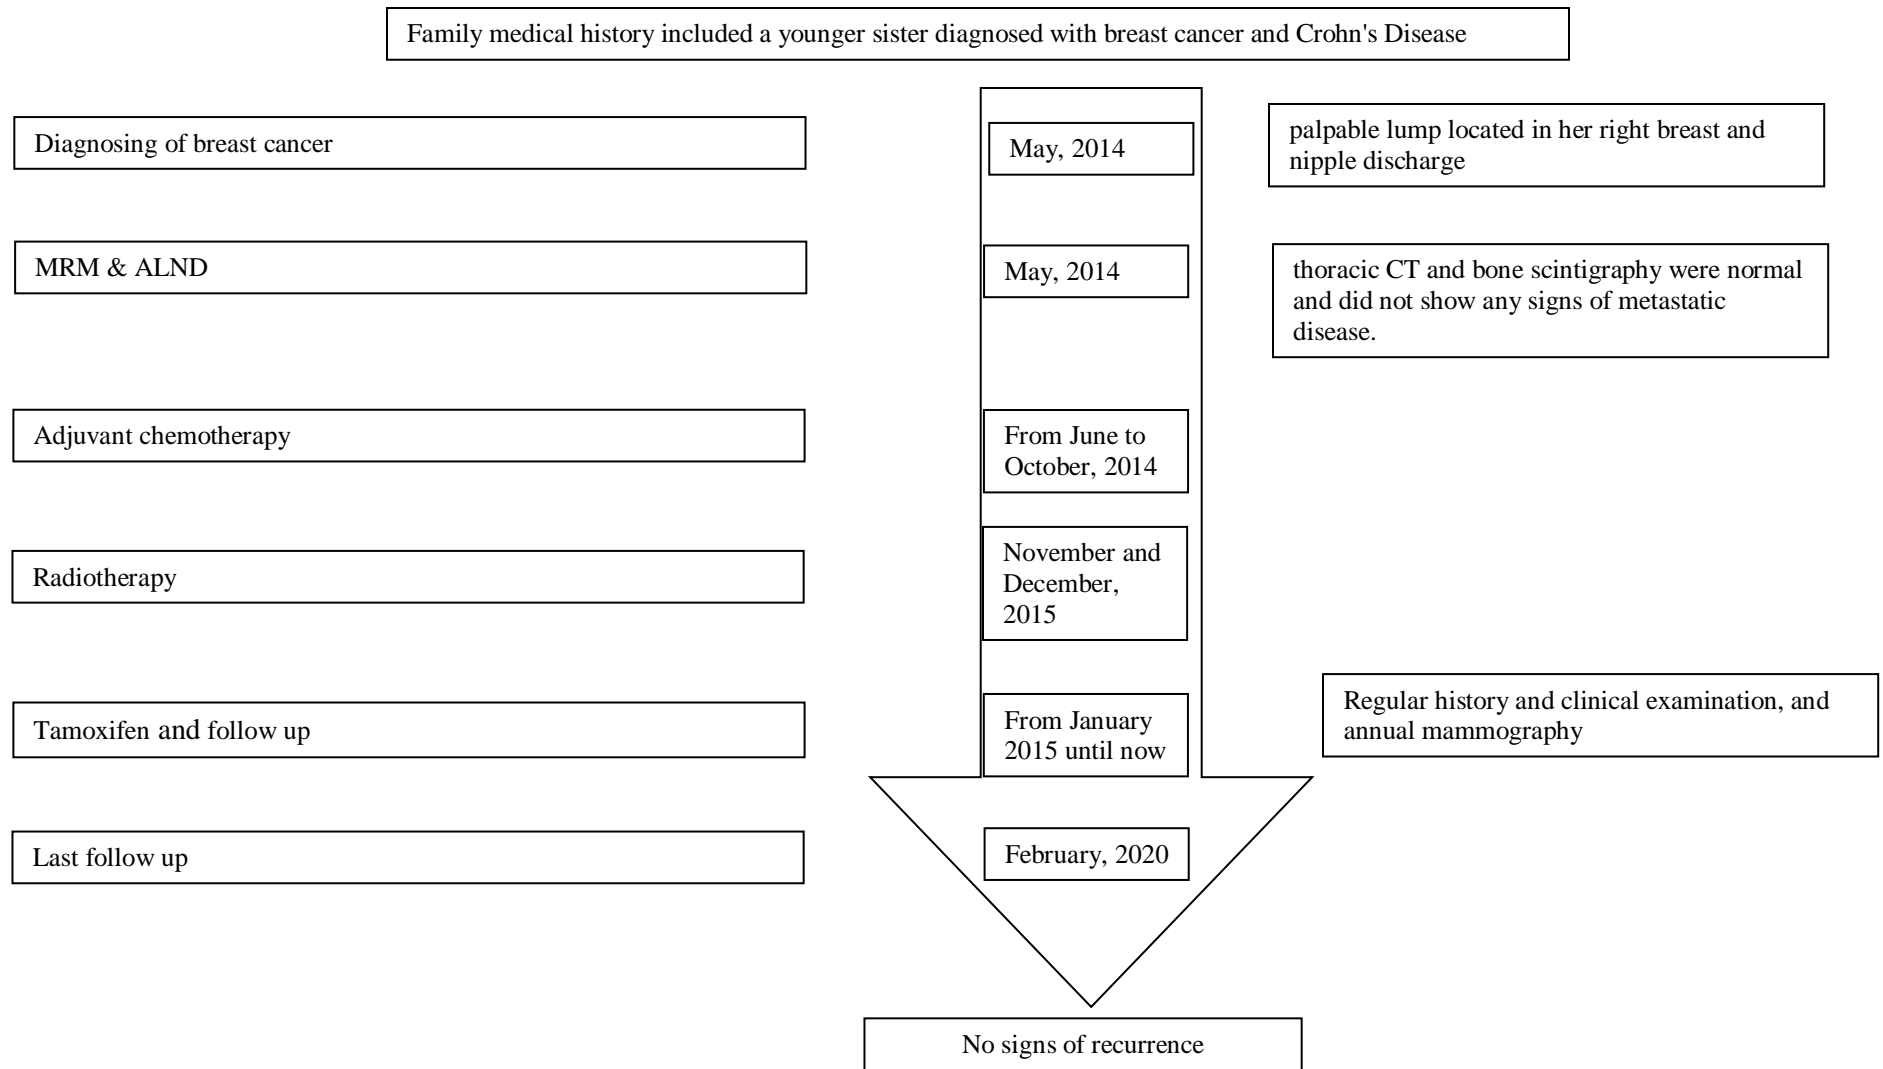

**Figure 2. The timeline for patient 2.**
